# Supplementary material
Source: ML conference proceedings conference paper supplement (https://proceedings.neurips.cc/paper_files/paper/2012/hash/700fdb2ba62d4554dc268c65add4b16e-Abstract.html)
Supplement: Supplementary file 1 [file 700fdb2ba62d4554dc268c65add4b16e-Supplemental.zip]

---

# Supplementary Material to “Spectral Learning of General Weighted Automata via Constrained Matrix Completion”

---

**Borja Balle**  
Universitat Politècnica de Catalunya  
bballe@lsi.upc.edu

**Mehryar Mohri**  
Courant Institute and Google Research  
mohri@cims.nyu.edu

For convenience we begin by recalling the statement of our main result and the key assumptions used in the proof.

**Assumption 1** *There exists a constant  $\nu > 0$  such that if  $(x, y) \sim \mathcal{D}$ , then  $|y| \leq \nu$  almost surely.*

**Assumption 2** *There exist constants  $c, \eta > 0$  such that  $\mathbb{P}_{x \sim \mathcal{D}_\Sigma}[|x| \geq t] \leq \exp(-ct^{1+\eta})$  holds for all  $t \geq 0$ .*

**Theorem 1** *Let  $Z$  be a sample formed by  $m$  i.i.d. examples generated from some distribution  $\mathcal{D}$  satisfying Assumptions 1 and 2. Let  $A_Z$  be the WFA returned by algorithm  $\text{HMC}_{p,\ell} + \text{SM}$  with  $p = 2$  and loss function  $\ell(y, y') = |y - y'|$ . Then, for any  $\delta > 0$ , the following holds with probability at least  $1 - \delta$  for  $f_Z = t_\nu \circ f_{A_Z}$ :*

$$R(f_Z) \leq \hat{R}_Z(f_Z) + O\left(\frac{\nu^4 |\mathcal{P}|^2 |\mathcal{S}|^{3/2} \ln m}{\tau \sigma^3 \rho \pi} \frac{1}{m^{1/3}} \sqrt{\ln \frac{1}{\delta}}\right).$$

## 1 Perturbation and stability tools

In this section, we list a series of known perturbation results for singular values, pseudo-inverses, and singular vectors, and other stability results needed for the proofs given in this appendix.

**Lemma 2 ([4])** *Let  $\mathbf{A}, \mathbf{B} \in \mathbb{R}^{d_1 \times d_2}$ . Then, for any  $n \in [1, \min\{d_1, d_2\}]$ , the following inequality holds:  $|\sigma_n(\mathbf{A}) - \sigma_n(\mathbf{B})| \leq \|\mathbf{A} - \mathbf{B}\|$ .*

**Lemma 3 ([4])** *Let  $\mathbf{A}, \mathbf{B} \in \mathbb{R}^{d_1 \times d_2}$ . Then the following upper bound holds for the norm of the difference of the pseudo-inverses of matrices  $\mathbf{A}$  and  $\mathbf{B}$ :*

$$\|\mathbf{A}^+ - \mathbf{B}^+\| \leq \frac{1 + \sqrt{5}}{2} \max\{\|\mathbf{A}^+\|^2, \|\mathbf{B}^+\|^2\} \|\mathbf{A} - \mathbf{B}\|$$

**Lemma 4 ([5])** *Let  $\mathbf{A} \in \mathbb{R}^{d \times d}$  be symmetric positive semidefinite matrix and  $\mathbf{E} \in \mathbb{R}^{d \times d}$  a symmetric matrix such that  $\mathbf{B} = \mathbf{A} + \mathbf{E}$  is positive semidefinite. Fix  $n \leq \text{rank}(\mathbf{A})$  and suppose that  $\|\mathbf{E}\|_F \leq (\lambda_n(\mathbf{A}) - \lambda_{n+1}(\mathbf{A}))/4$ . Then, writing  $\mathbf{V}_n$  for the top  $n$  eigenvectors of  $\mathbf{A}$  and  $\mathbf{W}_n$  for the top  $n$  eigenvectors of  $\mathbf{B}$ , we have*

$$\|\mathbf{V}_n - \mathbf{W}_n\|_F \leq \frac{4\|\mathbf{E}\|_F}{\lambda_n(\mathbf{A}) - \lambda_{n+1}(\mathbf{A})}. \quad (1)$$

This last lemma will be most useful to us in the form given in this next corollary.

**Corollary 5** Let  $\mathbf{A}, \mathbf{E} \in \mathbb{R}^{d_1 \times d_2}$  and write  $\mathbf{B} = \mathbf{A} + \mathbf{E}$ . Suppose  $n \leq \text{rank}(\mathbf{A})$  and  $\|\mathbf{E}\|_F \leq \sqrt{\sigma_n(\mathbf{A})^2 - \sigma_{n+1}(\mathbf{A})^2}/4$ . If  $\mathbf{V}_n, \mathbf{W}_n$  contain the first  $n$  right singular vectors of  $\mathbf{A}$  and  $\mathbf{B}$  respectively, then

$$\|\mathbf{V}_n - \mathbf{W}_n\|_F \leq \frac{8\|\mathbf{A}\|_F\|\mathbf{E}\|_F + 4\|\mathbf{E}\|_F^2}{\sigma_n(\mathbf{A})^2 - \sigma_{n+1}(\mathbf{A})^2}.$$

*Proof.* Using that  $\|\mathbf{A}^\top \mathbf{A} - \mathbf{B}^\top \mathbf{B}\|_F \leq 2\|\mathbf{A}\|_F\|\mathbf{E}\|_F + \|\mathbf{E}\|_F^2$  and  $\lambda_n(\mathbf{A}^\top \mathbf{A}) = \sigma_n(\mathbf{A})^2$ , we can apply Lemma 4 to get the bound on  $\|\mathbf{V}_n - \mathbf{W}_n\|_F$  under the condition that  $\|\mathbf{A}^\top \mathbf{A} - \mathbf{B}^\top \mathbf{B}\|_F \leq (\sigma_n(\mathbf{A})^2 - \sigma_{n+1}(\mathbf{A})^2)/4$ . To see that this last condition is satisfied, observe that for all  $x, y \geq 0$  one has  $\sqrt{1 + \sqrt{2}}\sqrt{x + y} \geq \sqrt{x} + \sqrt{y}$ . Thus, we get

$$\begin{aligned} \|\mathbf{E}\|_F &\leq \frac{\sqrt{\sigma_n(\mathbf{A})^2 - \sigma_{n+1}(\mathbf{A})^2}}{4} \\ &\leq \frac{\sqrt{\sigma_n(\mathbf{A})^2 - \sigma_{n+1}(\mathbf{A})^2} + \sqrt{4\|\mathbf{A}\|_F^2} - 2\|\mathbf{A}\|_F}{2\sqrt{1 + \sqrt{2}}} \\ &\leq \frac{\sqrt{4\|\mathbf{A}\|_F^2 + \sigma_n(\mathbf{A})^2 - \sigma_{n+1}(\mathbf{A})^2} - 2\|\mathbf{A}\|_F}{2}, \end{aligned}$$

and this last inequality implies  $2\|\mathbf{A}\|_F\|\mathbf{E}\|_F + \|\mathbf{E}\|_F^2 \leq (\sigma_n(\mathbf{A})^2 - \sigma_{n+1}(\mathbf{A})^2)/4$ .  $\square$

The next two results give useful extensions of McDiarmid's inequality to deal with functions that do not satisfy the bounded difference assumption almost surely [2].

**Definition 6** Let  $X = (X_1, \dots, X_m)$  be a random variable on a probability space  $\Omega^m$ . We say that a function  $\Phi: \Omega^m \rightarrow \mathbb{R}$  is strongly difference-bounded by  $(b, c, \delta)$  if the following holds: there exists a measurable subset  $E \subseteq \Omega^m$  with  $\mathbb{P}[E] \leq \delta$ , such that

- if  $X$  and  $X'$  differ only by one coordinate and  $X \notin E$ , then  $|\Phi(X) - \Phi(X')| \leq c$ ;
- for all  $X, X'$  that differ only by one coordinate  $|\Phi(X) - \Phi(X')| \leq b$ .

**Theorem 7** Let  $\Phi$  be a function over a probability space  $\Omega^m$  that is strongly difference-bounded by  $(b, c, \delta)$  with  $b \geq c > 0$ . Then, for any  $t > 0$ ,

$$\mathbb{P}[\Phi - \mathbb{E}[\Phi] \geq t] \leq \exp\left(\frac{-t^2}{8mc^2}\right) + \frac{mb\delta}{c}.$$

Furthermore, the same upper bound holds for  $\mathbb{P}[\mathbb{E}[\Phi] - \Phi \geq t]$ .

**Corollary 8** Let  $\Phi$  be a function over a probability space  $\Omega^m$  that is strongly difference-bounded by  $(b, \theta/m, \exp(-Km))$ . Then, for any  $0 < t \leq 2\theta\sqrt{K}$  and  $m \geq \max\{b/\theta, (9+18/K)\ln(3+6/K)\}$ ,

$$\mathbb{P}[\Phi - \mathbb{E}[\Phi] \geq t] \leq 2 \exp\left(\frac{-t^2 m}{8\theta^2}\right).$$

Furthermore, the same upper bound holds for  $\mathbb{P}[\mathbb{E}[\Phi] - \Phi \geq t]$ .

The following is another useful form of the previous Corollary.

**Corollary 9** Let  $\Phi$  be a function over a probability space  $\Omega^m$  that is strongly difference-bounded by  $(b, \theta/m, \exp(-Km))$ . Then, for any  $\delta > 0$  and any  $m \geq \max\{b/\theta, (9+18/K)\ln(3+6/K), (2/K)\ln(2/\delta)\}$ , each of the following holds with probability at least  $1 - \delta$ :

$$\begin{aligned} \Phi &\geq \mathbb{E}[\Phi] - \sqrt{\frac{8\theta^2}{m} \ln\left(\frac{2}{\delta}\right)}, \\ \Phi &\leq \mathbb{E}[\Phi] + \sqrt{\frac{8\theta^2}{m} \ln\left(\frac{2}{\delta}\right)}. \end{aligned}$$

## 2 Proof of Theorem 1

To analyze the stability of our algorithm, we consider a sample  $Z' = (z_1, \dots, z_{m-1}, z'_m)$  that differs from  $Z$  only by the last point ( $z'_m$  instead of  $z_m$ ). Example  $z'_m$  is an arbitrary point in the domain of  $\mathcal{D}$ . Throughout the analysis,  $h = h_Z$  and  $h' = h_{Z'}$  denote the functions in  $\mathbb{H}$  obtained by solving (HMC-h) respectively with training samples  $Z$  and  $Z'$  respectively. We also denote by  $\mathbf{H} = \mathbf{H}_Z$  and  $\mathbf{H}' = \mathbf{H}_{Z'}$  their corresponding Hankel matrices.

The following technical lemma will be used to study the algorithmic stability of the optimization problem (HMC-h).

**Lemma 10** *The following inequality holds for all samples  $Z$  and  $Z'$  differing by only one point:*

$$2\tau \|h - h'\|_2^2 \leq \widehat{R}_{\tilde{Z}}(h') - \widehat{R}_{\tilde{Z}}(h) + \widehat{R}_{\tilde{Z}'}(h) - \widehat{R}_{\tilde{Z}'}(h') .$$

*Proof.* The argument is the same as the one presented in [3] to bound the stability of kernel ridge regression. The following inequality is first shown using the expansion of  $\|h - h'\|_2^2$  in terms of the corresponding inner product:

$$2\tau \|h - h'\|_2^2 \leq \tau (B_N(h'|h) + B_N(h|h')) \leq B_{F_Z}(h'|h) + B_{F_{Z'}}(h|h') ,$$

where  $B_F$  denotes the Bregman divergence associated to  $F$ . Next, using the optimality of  $h$  and  $h'$ , which implies  $\nabla F_Z(h) = 0$  and  $\nabla F_{Z'}(h') = 0$ , we can write  $B_{F_Z}(h'|h) + B_{F_{Z'}}(h|h') = \widehat{R}_{\tilde{Z}}(h') - \widehat{R}_{\tilde{Z}}(h) + \widehat{R}_{\tilde{Z}'}(h) - \widehat{R}_{\tilde{Z}'}(h')$ .  $\square$

Our next lemma bounds the stability of the first stage of the algorithm using Lemma 10.

**Lemma 11** *Assume that  $\mathcal{D}$  satisfies Assumption 1. Then, the following holds:*

$$\|\mathbf{H} - \mathbf{H}'\|_F \leq \min \left\{ 2\nu \sqrt{|\mathcal{P}||\mathcal{S}|}, \frac{1}{\tau \min\{\tilde{m}, \tilde{m}'\}} \right\} .$$

*Proof.* Note that by Assumption 1, for all  $(x, y)$  in  $\tilde{Z}$ , or  $\tilde{Z}'$ , we have  $|y| \leq \nu$ . Therefore, we must have  $|\mathbf{H}(u, v)| \leq \nu$  for all  $u \in \mathcal{P}$  and  $v \in \mathcal{S}$ , otherwise the value of  $F_Z(\mathbf{H})$  is not minimal because decreasing the absolute value of an entry  $|\mathbf{H}(u, v)| > \nu$  decreases the value of  $F_Z(\mathbf{H})$ . The same holds for  $\mathbf{H}'$ . Thus, the first bound follows from  $\|\mathbf{H} - \mathbf{H}'\|_F \leq \|\mathbf{H}\|_F + \|\mathbf{H}'\|_F \leq 2\nu \sqrt{|\mathcal{P}||\mathcal{S}|}$ .

Now we proceed to show the second bound. Since by definition  $\|\mathbf{H} - \mathbf{H}'\|_F = \|h - h'\|_2$ , it is sufficient to bound this second quantity. By Lemma 10, we have

$$2\tau \|h - h'\|_2^2 \leq \widehat{R}_{\tilde{Z}}(h') - \widehat{R}_{\tilde{Z}}(h) + \widehat{R}_{\tilde{Z}'}(h) - \widehat{R}_{\tilde{Z}'}(h') . \quad (2)$$

We can consider four different situations for the right-hand side of this expression, depending on the membership of  $x_m$  and  $x'_m$  in the set  $\mathcal{PS}$ .

If  $x_m, x'_m \notin \mathcal{PS}$ , then  $\tilde{Z} = \tilde{Z}'$ . Therefore,  $\widehat{R}_{\tilde{Z}}(h) = \widehat{R}_{\tilde{Z}'}(h)$ ,  $\widehat{R}_{\tilde{Z}}(h') = \widehat{R}_{\tilde{Z}'}(h')$ , and  $\|h - h'\|_2 = 0$ .

If  $x_m, x'_m \in \mathcal{PS}$ , then  $\tilde{m} = \tilde{m}'$ , and the following equalities hold:

$$\begin{aligned} \widehat{R}_{\tilde{Z}'}(h) - \widehat{R}_{\tilde{Z}}(h) &= \frac{|h(x'_m) - y'_m| - |h(x_m) - y_m|}{\tilde{m}} , \\ \widehat{R}_{\tilde{Z}}(h') - \widehat{R}_{\tilde{Z}'}(h') &= \frac{|h'(x_m) - y_m| - |h'(x'_m) - y'_m|}{\tilde{m}} . \end{aligned}$$

Thus, in view of (2), we can write

$$2\tau \|h - h'\|_2^2 \leq \frac{|h(x_m) - h'(x_m)| + |h(x'_m) - h'(x'_m)|}{\tilde{m}} \leq \frac{2}{\tilde{m}} \|h - h'\|_2 ,$$

where the first inequality follows from  $||h(x) - y| - |h'(x) - y|| \leq |h(x) - h'(x)|$ , and the second from  $|h(x) - h'(x)| \leq \|h - h'\|_2$ .

If  $x_m \in \mathcal{PS}$  and  $x'_m \notin \mathcal{PS}$ , the right-hand side of (2) equals

$$\sum_{z \in \tilde{Z}'} \left( \frac{|h'(x) - y|}{\tilde{m}} - \frac{|h'(x) - y|}{\tilde{m}'} + \frac{|h(x) - y|}{\tilde{m}'} - \frac{|h(x) - y|}{\tilde{m}} \right) + \frac{|h'(x_m) - y_m|}{\tilde{m}} - \frac{|h(x_m) - y_m|}{\tilde{m}}.$$

Now, since  $\tilde{m} = \tilde{m}' + 1$  we can write

$$2\tau \|h - h'\|_2^2 \leq \sum_{z \in \tilde{Z}'} \frac{|h(x) - h'(x)|}{\tilde{m} \tilde{m}'} + \frac{|h(x_m) - h'(x_m)|}{\tilde{m}} \leq \frac{2}{\tilde{m}} \|h - h'\|_2.$$

By symmetry, a similar bound holds in the case where  $x_m \notin \mathcal{PS}$  and  $x'_m \in \mathcal{PS}$ . Combining these four bounds yields the desired inequality.  $\square$

The next three lemmas contain the main technical tools needed to bound the difference  $|f_{A_Z}(x) - f_{A_{Z'}}(x)|$  in our agnostic setting.

**Lemma 12** *Let  $A = \langle \alpha, \beta, \{\mathbf{A}_a\} \rangle$  and  $A' = \langle \alpha', \beta', \{\mathbf{A}'_a\} \rangle$  be two weighted automata with  $n$  states. Let  $\gamma$  be such that both  $A$  and  $A'$  are  $\gamma$ -bounded. Then, the following inequality holds for any string  $x \in \Sigma^*$ :*

$$|f_A(x) - f_{A'}(x)| \leq \gamma^{|x|+1} \left( \|\alpha - \alpha'\| + \|\beta - \beta'\| + \sum_{i=1}^{|x|} \|\mathbf{A}_{x_i} - \mathbf{A}'_{x_i}\| \right).$$

*Proof.* Follows by induction on  $|x|$  using techniques similar to those used to prove Lemmas 11 and 12 in [1].  $\square$

**Lemma 13** *Let  $\gamma = \nu \sqrt{|\mathcal{P}||\mathcal{S}|} / \sigma_n(\mathbf{H}_\epsilon)$ . The weighted automaton  $A_Z$  is  $\gamma$ -bounded.*

*Proof.* Since  $\|\mathbf{H}_a\| \leq \|\mathbf{H}_a\|_F \leq \nu \sqrt{|\mathcal{P}||\mathcal{S}|}$ , simple calculations show that  $\|\alpha^\top\| \leq \nu \sqrt{|\mathcal{S}|}$ ,  $\|\beta\| \leq \nu \sqrt{|\mathcal{P}|} / \sigma_n(\mathbf{H}_\epsilon)$ , and  $\|\mathbf{A}_a\| \leq \nu \sqrt{|\mathcal{P}||\mathcal{S}|} / \sigma_n(\mathbf{H}_\epsilon)$ .  $\square$

Let us define the following quantities in terms of the vectors and matrices that define  $A$  and  $A'$ :

$$\begin{aligned} \varepsilon_\epsilon &= \|\mathbf{H}_\epsilon - \mathbf{H}'_\epsilon\|, \\ \varepsilon_a &= \|\mathbf{H}_a - \mathbf{H}'_a\|, \\ \varepsilon_V &= \|\mathbf{V} - \mathbf{V}'\|, \\ \varepsilon_S &= \|\mathbf{h}_{\lambda, S} - \mathbf{h}'_{\lambda, S}\|, \\ \varepsilon_P &= \|\mathbf{h}_{P, \lambda} - \mathbf{h}'_{P, \lambda}\|. \end{aligned}$$

Now we state a result that will be used in the proof of Lemma 15.

**Lemma 14** *The following three bounds hold:*

$$\begin{aligned} \|\mathbf{A}_a - \mathbf{A}'_a\| &\leq \frac{\varepsilon_a + \varepsilon_V \|\mathbf{H}'_a\|}{\sigma_n(\mathbf{H}_\epsilon \mathbf{V})} + \frac{1 + \sqrt{5}}{2} \frac{\|\mathbf{H}'_a\| (\varepsilon_\epsilon + \varepsilon_V \|\mathbf{H}'_\epsilon\|)}{\min\{\sigma_n(\mathbf{H}_\epsilon \mathbf{V})^2, \sigma_n(\mathbf{H}'_\epsilon \mathbf{V}')^2\}}, \\ \|\alpha - \alpha'\| &\leq \varepsilon_S + \varepsilon_V \|\mathbf{h}_{\lambda, S}\|, \\ \|\beta - \beta'\| &\leq \frac{\varepsilon_P}{\sigma_n(\mathbf{H}_\epsilon \mathbf{V})} + \frac{1 + \sqrt{5}}{2} \frac{\|\mathbf{h}'_{P, \lambda}\| (\varepsilon_\epsilon + \varepsilon_V \|\mathbf{H}'_\epsilon\|)}{\min\{\sigma_n(\mathbf{H}_\epsilon \mathbf{V})^2, \sigma_n(\mathbf{H}'_\epsilon \mathbf{V}')^2\}}. \end{aligned}$$

*Proof.* Using the triangle inequality, the submultiplicativity of the operator norm, and the properties of the pseudo-inverse, we can write

$$\begin{aligned} \|\mathbf{A}_a - \mathbf{A}'_a\| &= \|(\mathbf{H}_\epsilon \mathbf{V})^+ (\mathbf{H}_a \mathbf{V} - \mathbf{H}'_a \mathbf{V}') + ((\mathbf{H}'_\epsilon \mathbf{V}')^+ - (\mathbf{H}_\epsilon \mathbf{V})^+) \mathbf{H}'_a \mathbf{V}'\| \\ &\leq \|(\mathbf{H}_\epsilon \mathbf{V})^+\| \|\mathbf{H}_a \mathbf{V} - \mathbf{H}'_a \mathbf{V}'\| + \|(\mathbf{H}_\epsilon \mathbf{V})^+ - (\mathbf{H}'_\epsilon \mathbf{V}')^+\| \|\mathbf{H}'_a \mathbf{V}'\| \\ &\leq \sigma_n(\mathbf{H}_\epsilon \mathbf{V})^{-1} \|\mathbf{H}_a \mathbf{V} - \mathbf{H}'_a \mathbf{V}'\| + \|\mathbf{H}'_a\| \|(\mathbf{H}_\epsilon \mathbf{V})^+ - (\mathbf{H}'_\epsilon \mathbf{V}')^+\|, \end{aligned}$$

where we used that  $\|(\mathbf{H}_\epsilon \mathbf{V})^+\| = \sigma_n(\mathbf{H}_\epsilon \mathbf{V})$  by the properties of pseudo-inverse and operator norm, and  $\|\mathbf{H}'_a \mathbf{V}'\| \leq \|\mathbf{H}'_a\|$  by sub-multiplactivity and  $\|\mathbf{V}'\| = 1$ . Now note that we also have

$$\|\mathbf{H}_a \mathbf{V} - \mathbf{H}'_a \mathbf{V}'\| \leq \|\mathbf{V}\| \|\mathbf{H}_a - \mathbf{H}'_a\| + \|\mathbf{H}'_a\| \|\mathbf{V} - \mathbf{V}'\| \leq \varepsilon_a + \varepsilon_V \|\mathbf{H}'_a\|.$$

Furthermore, using Lemma 3 we obtain

$$\begin{aligned} \|(\mathbf{H}_\epsilon \mathbf{V})^+ - (\mathbf{H}'_\epsilon \mathbf{V}')^+\| &\leq \frac{1 + \sqrt{5}}{2} \|\mathbf{H}_\epsilon \mathbf{V} - \mathbf{H}'_\epsilon \mathbf{V}'\| \max\{\|(\mathbf{H}_\epsilon \mathbf{V})^+\|^2, \|(\mathbf{H}'_\epsilon \mathbf{V}')^+\|^2\} \\ &\leq \frac{1 + \sqrt{5}}{2} \frac{\|\mathbf{H}_\epsilon - \mathbf{H}'_\epsilon\| \|\mathbf{V}\| + \|\mathbf{H}'_\epsilon\| \|\mathbf{V} - \mathbf{V}'\|}{\min\{\sigma_n(\mathbf{H}_\epsilon \mathbf{V})^2, \sigma_n(\mathbf{H}'_\epsilon \mathbf{V}')^2\}} \\ &= \frac{1 + \sqrt{5}}{2} \frac{\varepsilon_\epsilon + \varepsilon_V \|\mathbf{H}'_\epsilon\|}{\min\{\sigma_n(\mathbf{H}_\epsilon \mathbf{V})^2, \sigma_n(\mathbf{H}'_\epsilon \mathbf{V}')^2\}}. \end{aligned}$$

Thus we get the first of the bounds. The second bound follows straightforwardly from

$$\|\mathbf{V}^\top \mathbf{h}_{\lambda, \mathcal{S}} - \mathbf{V}'^\top \mathbf{h}'_{\lambda, \mathcal{S}}\| \leq \|\mathbf{V}^\top - \mathbf{V}'^\top\| \|\mathbf{h}_{\lambda, \mathcal{S}}\| + \|\mathbf{V}'^\top\| \|\mathbf{h}_{\lambda, \mathcal{S}} - \mathbf{h}'_{\lambda, \mathcal{S}}\| = \varepsilon_{\mathcal{S}} + \varepsilon_V \|\mathbf{h}_{\lambda, \mathcal{S}}\|,$$

which uses that  $\|\mathbf{M}^\top\| = \|\mathbf{M}\|$  holds for the operator norm.

Finally, the last bound follows from the following inequalities, where we use Lemma 3 again:

$$\begin{aligned} \|\beta - \beta'\| &\leq \|(\mathbf{H}_\epsilon \mathbf{V})^+\| \|\mathbf{h}_{\mathcal{P}, \lambda} - \mathbf{h}'_{\mathcal{P}, \lambda}\| + \|\mathbf{h}'_{\mathcal{P}, \lambda}\| \|(\mathbf{H}_\epsilon \mathbf{V})^+ - (\mathbf{H}'_\epsilon \mathbf{V}')^+\| \\ &\leq \frac{\|\mathbf{h}_{\mathcal{P}, \lambda} - \mathbf{h}'_{\mathcal{P}, \lambda}\|}{\sigma_n(\mathbf{H}_\epsilon \mathbf{V})} + \frac{1 + \sqrt{5}}{2} \frac{\|\mathbf{h}'_{\mathcal{P}, \lambda}\| \|\mathbf{H}_\epsilon \mathbf{V} - \mathbf{H}'_\epsilon \mathbf{V}'\|}{\min\{\sigma_n(\mathbf{H}_\epsilon \mathbf{V})^2, \sigma_n(\mathbf{H}'_\epsilon \mathbf{V}')^2\}} \\ &\leq \frac{\varepsilon_{\mathcal{P}}}{\sigma_n(\mathbf{H}_\epsilon \mathbf{V})} + \frac{1 + \sqrt{5}}{2} \frac{\|\mathbf{h}'_{\mathcal{P}, \lambda}\| (\varepsilon_\epsilon + \varepsilon_V \|\mathbf{H}'_\epsilon\|)}{\min\{\sigma_n(\mathbf{H}_\epsilon \mathbf{V})^2, \sigma_n(\mathbf{H}'_\epsilon \mathbf{V}')^2\}}. \end{aligned}$$

□

**Lemma 15** Let  $\varepsilon = \|\mathbf{H} - \mathbf{H}'\|_F$ ,  $\hat{\sigma} = \min\{\sigma_n(\mathbf{H}_\epsilon), \sigma_n(\mathbf{H}'_\epsilon)\}$ , and  $\hat{\rho} = \sigma_n(\mathbf{H}_\epsilon)^2 - \sigma_{n+1}(\mathbf{H}_\epsilon)^2$ . Suppose  $\varepsilon \leq \sqrt{\hat{\rho}}/4$ . There exists a universal constant  $c_1 > 0$  such that the following inequalities hold for all  $a \in \Sigma$ :

$$\begin{aligned} \|\mathbf{A}_a - \mathbf{A}'_a\| &\leq c_1 \frac{\varepsilon \nu^3 |\mathcal{P}|^{3/2} |\mathcal{S}|^{1/2}}{\hat{\rho} \hat{\sigma}^2}, \\ \|\alpha - \alpha'\| &\leq c_1 \frac{\varepsilon \nu^2 |\mathcal{P}|^{1/2} |\mathcal{S}|}{\hat{\rho}}, \\ \|\beta - \beta'\| &\leq c_1 \frac{\varepsilon \nu^3 |\mathcal{P}|^{3/2} |\mathcal{S}|^{1/2}}{\hat{\rho} \hat{\sigma}^2}. \end{aligned}$$

*Proof.* We begin with a few observations that will help us apply Lemma 14. First note that  $\|\mathbf{H}_a - \mathbf{H}'_a\| \leq \|\mathbf{H}_a - \mathbf{H}'_a\|_F \leq \varepsilon$  for all  $a \in \Sigma'$ , as well as  $\|\mathbf{h}_{\mathcal{P}, \lambda} - \mathbf{h}'_{\mathcal{P}, \lambda}\| \leq \varepsilon$  and  $\|\mathbf{h}_{\lambda, \mathcal{S}} - \mathbf{h}'_{\lambda, \mathcal{S}}\| \leq \varepsilon$ . Furthermore,  $\|\mathbf{H}_a\| \leq \|\mathbf{H}_a\|_F \leq \nu \sqrt{|\mathcal{P}| |\mathcal{S}|}$  and  $\|\mathbf{H}'_a\| \leq \nu \sqrt{|\mathcal{P}| |\mathcal{S}|}$  for all  $a \in \Sigma'$ . In addition, we have  $\|\mathbf{h}_{\lambda, \mathcal{S}}\| \leq \nu \sqrt{|\mathcal{S}|}$  and  $\|\mathbf{h}'_{\mathcal{P}, \lambda}\| \leq \nu \sqrt{|\mathcal{P}|}$ . Finally, by construction we also have  $\sigma_n(\mathbf{H}_\epsilon \mathbf{V}) = \sigma_n(\mathbf{H}_\epsilon)$  and  $\sigma_n(\mathbf{H}'_\epsilon \mathbf{V}') = \sigma_n(\mathbf{H}'_\epsilon)$ . Therefore, it only remains to bound  $\|\mathbf{V} - \mathbf{V}'\|$ , which by Corollary 5 is

$$\|\mathbf{V} - \mathbf{V}'\| \leq \frac{4\varepsilon}{\hat{\rho}} (2\nu \sqrt{|\mathcal{P}| |\mathcal{S}|} + \varepsilon) \leq \frac{16\varepsilon \nu \sqrt{|\mathcal{P}| |\mathcal{S}|}}{\hat{\rho}},$$

where the last inequality follows from Lemma 11.

Plugging all the bounds above in Lemma 14 yields the following inequalities:

$$\begin{aligned} \|\mathbf{A}_a - \mathbf{A}'_a\| &\leq \frac{\varepsilon}{\hat{\sigma}} \left(1 + \frac{16\nu |\mathcal{P}|^{1/2} |\mathcal{S}|^{1/2}}{\hat{\rho}}\right) + \frac{1 + \sqrt{5}}{2} \frac{\varepsilon \nu |\mathcal{P}|^{1/2} |\mathcal{S}|^{1/2}}{\hat{\sigma}^2} \left(1 + \frac{16\nu^2 |\mathcal{P}| |\mathcal{S}|}{\hat{\rho}}\right), \\ \|\alpha - \alpha'\| &\leq \varepsilon \left(1 + \frac{16\nu^2 |\mathcal{P}|^{1/2} |\mathcal{S}|}{\hat{\rho}}\right), \\ \|\beta - \beta'\| &\leq \frac{\varepsilon}{\hat{\sigma}} + \frac{1 + \sqrt{5}}{2} \frac{\varepsilon \nu |\mathcal{P}|^{1/2}}{\hat{\sigma}^2} \left(1 + \frac{16\nu^2 |\mathcal{P}| |\mathcal{S}|}{\hat{\rho}}\right). \end{aligned}$$

The result now follows from an adequate choice of  $c_1$ .  $\square$

We now define the properties that make  $Z$  a good sample and show that for large enough  $m$  they are satisfied with high probability.

**Definition 16** We say that a sample  $Z$  of  $m$  i.i.d. examples from  $\mathcal{D}$  is good if the following conditions are satisfied for any  $z'_m = (x'_m, y'_m) \in \text{supp}(\mathcal{D})$ :

- $|x_i| \leq ((1/c) \ln(4m^4))^{1/(1+\eta)}$  for all  $1 \leq i \leq m$ ;
- $\|\mathbf{H} - \mathbf{H}'\|_F \leq 4/(\tau\pi m)$ ;
- $\min\{\sigma_n(\mathbf{H}_\epsilon), \sigma_n(\mathbf{H}'_\epsilon)\} \geq \sigma/2$ ;
- $\sigma_n(\mathbf{H}_\epsilon)^2 - \sigma_{n+1}(\mathbf{H}_\epsilon)^2 \geq \rho/2$ .

**Lemma 17** Suppose  $\mathcal{D}$  satisfies Assumptions 1 and 2. There exists a quantity  $M = \text{poly}(\nu, \pi, \sigma, \rho, \tau, |\mathcal{P}|, |\mathcal{S}|)$  such that if  $m \geq M$ , then  $Z$  is good with probability at least  $1 - 1/m^3$ .

*Proof.* First note that by Assumption 2, writing  $L = ((1/c) \ln(4m^4))^{1/(1+\eta)}$  a union bound yields

$$\mathbb{P} \left[ \bigvee_{i=1}^m |x_i| > L \right] \leq m \exp(-cL^{1+\eta}) = \frac{1}{4m^3} .$$

Now let  $\bar{m} = (x_1, \dots, x_{m-1}) \cap (\mathcal{P}\mathcal{S})$ . Note that we have  $\min\{\bar{m}, \bar{m}'\} \geq \bar{m}$  and  $\mathbb{E}_Z[\bar{m}] = \pi(m-1)$ . Thus, for any  $\Delta \in (0, 1)$  the Chernoff bound gives

$$\mathbb{P}[\bar{m} < \pi(m-1)(1-\Delta)] \leq \exp\left(-\frac{(m-1)\pi\Delta^2}{2}\right) \leq \exp\left(-\frac{m\pi\Delta^2}{4}\right) ,$$

where we have used that  $(m-1)/m \geq 1/2$  for  $m \geq 2$ .

Taking  $\Delta = \sqrt{(4/m\pi) \ln(4m^3)}$  above we see that  $\min\{\bar{m}, \bar{m}'\} \geq (m-1)\pi(1-\Delta) \geq m\pi(1-\Delta)/2$  holds with probability at least  $1 - 1/(4m^3)$ . Now note that  $m \geq (16/\pi) \ln(4m^3)$  implies  $\Delta \leq 1/2$ . Therefore, by Lemma 11 we have that  $m \geq \max\{2, (16/\pi) \ln(4m^3), 2/(\tau\pi\nu\sqrt{|\mathcal{P}||\mathcal{S}|})\}$  implies that  $\|\mathbf{H} - \mathbf{H}'\|_F \leq 4/(\tau\pi m)$  holds with probability at least  $1 - 1/(4m^3)$ .

For the third claim note that by Lemma 2 we have  $|\sigma_n(\mathbf{H}_\epsilon) - \sigma_n(\mathbf{H}'_\epsilon)| \leq \|\mathbf{H}_\epsilon - \mathbf{H}'_\epsilon\|_F \leq \|\mathbf{H} - \mathbf{H}'\|_F$ . Thus, from the argument we just used in the previous bound we can see that when  $m \geq 2$  the function  $\Phi(Z) = \sigma_n(\mathbf{H}_\epsilon)$  is strongly difference-bounded by  $(b_\sigma, \theta_\sigma/m, \exp(-K_\sigma m))$  with  $b_\sigma = 2\nu\sqrt{|\mathcal{P}||\mathcal{S}|}$ ,  $\theta_\sigma = 2/(\tau\pi(1-\Delta))$ , and  $K_\sigma = \pi\Delta^2/4$  for any  $\Delta \in (0, 1)$ . Now note that by Lemma 2 and the previous goodness condition on  $\|\mathbf{H} - \mathbf{H}'\|_F$  we have  $\min\{\sigma_n(\mathbf{H}_\epsilon), \sigma_n(\mathbf{H}'_\epsilon)\} \geq \sigma_n(\mathbf{H}_\epsilon) - \|\mathbf{H} - \mathbf{H}'\|_F \geq \sigma_n(\mathbf{H}_\epsilon) - 4/(\nu\pi m)$ . Furthermore, taking  $\Delta = 1/2$  and assuming that

$$m \geq \max \left\{ \frac{\nu\tau\pi\sqrt{|\mathcal{P}||\mathcal{S}|}}{2}, \left(9 + \frac{288}{\pi}\right) \ln \left(3 + \frac{96}{\pi}\right), \frac{32}{\pi} \ln(8m^3) \right\} ,$$

we can apply Corollary 9 with  $\delta = 1/(4m^3)$  to see that

$$\sigma_n(\mathbf{H}_\epsilon) - \frac{4}{\nu\pi m} \geq \sigma - \sqrt{\frac{128}{\tau^2\pi^2 m} \ln(8m^3)} - \frac{4}{\nu\pi m}$$

holds with probability at least  $1 - 1/(4m^3)$ . Hence, for any sample size such that  $m \geq \max\{16/(\nu\pi\sigma), (2048/\tau^2\pi^2\sigma^2) \ln(8m^3)\}$ , we get

$$\min\{\sigma_n(\mathbf{H}_\epsilon), \sigma_n(\mathbf{H}'_\epsilon)\} \geq \sigma - \sqrt{\frac{128}{\tau^2\pi^2 m} \ln(8m^3)} - \frac{4}{\nu\pi m} \geq \sigma - \frac{\sigma}{4} - \frac{\sigma}{4} = \frac{\sigma}{2} .$$

To prove the fourth bound we shall study the stability of  $\Phi(Z) = \sigma_n(\mathbf{H}_\epsilon)^2 - \sigma_{n+1}(\mathbf{H}_\epsilon)^2$ . We begin with the following chain of inequalities, which follows from Lemma 2 and  $\sigma_n(\mathbf{H}_\epsilon) \geq \sigma_{n+1}(\mathbf{H}_\epsilon)$ :

$$\begin{aligned} |\Phi(Z) - \Phi(Z')| &= |(\sigma_n(\mathbf{H}_\epsilon)^2 - \sigma_{n+1}(\mathbf{H}_\epsilon)^2) - (\sigma_n(\mathbf{H}'_\epsilon)^2 - \sigma_{n+1}(\mathbf{H}'_\epsilon)^2)| \\ &\leq |\sigma_n(\mathbf{H}_\epsilon)^2 - \sigma_n(\mathbf{H}'_\epsilon)^2| + |\sigma_{n+1}(\mathbf{H}_\epsilon)^2 - \sigma_{n+1}(\mathbf{H}'_\epsilon)^2| \\ &= |\sigma_n(\mathbf{H}_\epsilon) + \sigma_n(\mathbf{H}'_\epsilon)| |\sigma_n(\mathbf{H}_\epsilon) - \sigma_n(\mathbf{H}'_\epsilon)| + |\sigma_{n+1}(\mathbf{H}_\epsilon) + \sigma_{n+1}(\mathbf{H}'_\epsilon)| |\sigma_{n+1}(\mathbf{H}_\epsilon) - \sigma_{n+1}(\mathbf{H}'_\epsilon)| \\ &\leq (2\sigma_n(\mathbf{H}_\epsilon) + \|\mathbf{H}_\epsilon - \mathbf{H}'_\epsilon\|) \|\mathbf{H}_\epsilon - \mathbf{H}'_\epsilon\| + (2\sigma_{n+1}(\mathbf{H}_\epsilon) + \|\mathbf{H}_\epsilon - \mathbf{H}'_\epsilon\|) \|\mathbf{H}_\epsilon - \mathbf{H}'_\epsilon\| \\ &\leq 4\sigma_n(\mathbf{H}_\epsilon) \|\mathbf{H} - \mathbf{H}'\|_F + 2\|\mathbf{H} - \mathbf{H}'\|_F^2. \end{aligned}$$

Now we can use this last bound to show that  $\Phi(Z)$  is strongly difference-bounded by  $(b_\rho, \theta_\rho/m, \exp(-K_\rho m))$  with the definitions:  $b_\rho = 16\nu^2|\mathcal{P}||\mathcal{S}|$ ,  $\theta_\rho = 64\sigma/(\tau\pi)$  and  $K_\rho = \min\{\sigma^2\tau^2\pi^2/256, \pi/64\}$ . For  $b_\rho$  just observe that from Lemma 11 and  $\sigma_n(\mathbf{H}_\sigma) \leq \|\mathbf{H}_\sigma\|_F \leq \nu\sqrt{|\mathcal{P}||\mathcal{S}|}$  we get

$$4\sigma_n(\mathbf{H}_\epsilon) \|\mathbf{H} - \mathbf{H}'\|_F + 2\|\mathbf{H} - \mathbf{H}'\|_F^2 \leq 16\nu^2|\mathcal{P}||\mathcal{S}|.$$

By the same arguments used above, if  $m$  is large enough we have  $\|\mathbf{H} - \mathbf{H}'\|_F \leq 4/(\tau\pi m)$  with probability at least  $1 - \exp(-m\pi/16)$ . Furthermore, by taking  $\Delta = 1/2$  in the stability argument given above for  $\sigma_n(\mathbf{H}_\epsilon)$ , and invoking Corollary 9 with  $\delta = 2\exp(-Km)$  for some  $0 < K \leq K_\sigma/2 = \pi/32$ , we get

$$\sigma_n(\mathbf{H}_\epsilon) \leq \sigma + \sqrt{\frac{128K}{\tau^2\pi^2}},$$

with probability at least  $1 - 2\exp(-Km)$ . Thus, taking  $K = \min\{\pi/32, \sigma^2\tau^2\pi^2/128\}$  we get  $\sigma_n(\mathbf{H}_\epsilon) \leq 2\sigma$ . If we now combine the bounds for  $\|\mathbf{H} - \mathbf{H}'\|_F$  and  $\sigma_n(\mathbf{H}_\epsilon)$ , we get

$$4\sigma_n(\mathbf{H}_\epsilon) \|\mathbf{H} - \mathbf{H}'\|_F + 2\|\mathbf{H} - \mathbf{H}'\|_F^2 \leq \frac{32\sigma}{\tau\pi m} + \frac{32}{\tau^2\pi^2 m^2} \leq \frac{64\sigma}{\tau\pi m} = \frac{\theta_\rho}{m},$$

where we have assumed that  $m \geq 1/(\tau\pi\sigma)$ . To get  $K_\rho$  note that the above bound holds with probability at least

$$1 - e^{-m\pi/16} - 2e^{-Km} \geq 1 - 3e^{-Km} \geq 1 - e^{-Km/2} = 1 - e^{-K_\rho m},$$

where we have used that  $K \leq \pi/16$  and assumed that  $m \geq 2\ln(3)/K$ . Finally, applying Corollary 9 to  $\Phi(Z)$  we see that with probability at least  $1 - 1/(4m^3)$  one has

$$\sigma_n(\mathbf{H}_\epsilon)^2 - \sigma_{n+1}(\mathbf{H}_\epsilon)^2 \geq \rho - \sqrt{\frac{2^{15}\sigma^2}{\tau^2\pi^2 m} \ln(8m^3)} \geq \frac{\rho}{2},$$

whenever  $m \geq \max\{(2^{17}\sigma^2/\tau^2\pi^2\rho^2) \ln(8m^3), \nu^2\tau\pi|\mathcal{P}||\mathcal{S}|/(4\sigma), (9 + 18/K_\rho) \ln(3 + 6/K_\rho), (2/K_\rho) \ln(8m^3)\}$ .  $\square$

We can now analyze how the change of one sample point in  $Z$  can affect the difference  $R(f_Z) - \hat{R}_Z(f_Z)$ . Our main result will be obtained by applying Theorem 7 to this difference.

**Lemma 18** *Let  $\gamma_1 = 64\nu^4|\mathcal{P}|^2|\mathcal{S}|^{3/2}/(\tau\sigma^3\rho\pi)$  and  $\gamma_2 = 2\nu|\mathcal{P}|^{1/2}|\mathcal{S}|^{1/2}/\sigma$ . If  $m \geq \max\{M, 16\sqrt{2}/(\tau\pi\sqrt{\rho}), \exp(6\ln\gamma_2(1.2c\ln\gamma_2)^{1/\eta})\}$ , then the function  $\Phi(Z) = R(f_Z) - \hat{R}_Z(f_Z)$  is strongly difference-bounded by  $(4\nu + 2\nu/m, c_2\gamma_1 m^{-5/6} \ln m, 1/m^3)$  for some constant  $c_2 > 0$ .*

*Proof.* We will write for short  $f = f_Z$  and  $f' = f_{Z'}$ . Let  $\beta_1 = \mathbb{E}_{x \sim \mathcal{D}_\Sigma}[|f(x) - f'(x)|]$  and  $\beta_2 = \max_{1 \leq i \leq m-1} |f(x_i) - f'(x_i)|$ . We first show that  $|\Phi(Z) - \Phi(Z')| \leq \beta_1 + \beta_2 + 2\nu/m$ . By definition of  $\Phi$  we can write

$$|\Phi(Z) - \Phi(Z')| \leq |R(f) - R(f')| + |\hat{R}_Z(f) - \hat{R}_{Z'}(f')|.$$

By Jensen's inequality, the first term can be upper bounded by  $\mathbb{E}_{(x,y) \sim \mathcal{D}}[|f(x) - y| + |f'(x) - y|] \leq \beta_1$ . Now, using the triangle inequality and  $|f(x_m) - y_m|, |f'(x'_m) - y'_m| \leq 2\nu$ , the second term can be bounded as follows:

$$|\hat{R}_Z(f) - \hat{R}_{Z'}(f')| \leq \frac{2\nu}{m} + \frac{1}{m} \sum_{i=1}^{m-1} |f(x_i) - f'(x_i)| \leq \frac{2\nu}{m} + \beta_2 \frac{m-1}{m}.$$

Observe that for any samples  $Z$  and  $Z'$  we have  $\beta_1, \beta_2 \leq 2\nu$ . This provides an almost-sure upper bound needed in the definition of strongly difference-boundedness. We use this bound when the sample  $Z$  is not good. By Lemma 17, when  $m$  is large enough this event will occur with probability at most  $1/m^3$ .

It remains to bound  $\beta_1$  and  $\beta_2$  assuming that  $Z$  is good. Note that by Lemma 17,  $m \geq \max\{M, 16\sqrt{2}/(\tau\pi\sqrt{\rho})\}$  implies  $\|\mathbf{H} - \mathbf{H}'\|_F \leq \sqrt{\hat{\rho}}/4$ . Thus, by combining Lemmas 12, 13, 15, and 17, we see that the following holds for any  $x \in \Sigma^*$ :

$$\begin{aligned} |f(x) - f'(x)| &\leq \left( \frac{2\nu|\mathcal{P}|^{1/2}|\mathcal{S}|^{1/2}}{\sigma} \right)^{|x|+1} \frac{32c_1(|x|+2)\nu^3|\mathcal{P}|^{3/2}|\mathcal{S}|}{m\tau\pi\sigma^2\rho} \\ &= \frac{c_1\gamma_1}{m} \exp(|x| \ln \gamma_2 + \ln(|x|+2)) . \end{aligned}$$

In particular, for  $|x| \leq L = ((1/c) \ln(4m^4))^{1/(1+\eta)}$  and  $m \geq \exp(6 \ln \gamma_2 (1.2c \ln \gamma_2)^{1/\eta})$ , a simple calculation shows that  $|f(x) - f'(x)| \leq C\gamma_1 m^{-5/6} \ln m$  for some constant  $C$ . Thus, we can write

$$\beta_1 \leq \mathbb{E}_{x \sim \mathcal{D}_\Sigma} [|f(x) - f'(x)| \mid |x| \leq L] + 2\nu \mathbb{P}_{x \sim \mathcal{D}_\Sigma} [|x| \geq L] \leq C\gamma_1 m^{-5/6} \ln m + \nu/2m^3$$

and  $\beta_2 \leq C\gamma_1 m^{-5/6} \ln m$ , where the last bound follows from the goodness of  $Z$ . Combining these bounds yields the desired result.  $\square$

The following is the proof of our main result.

*Proof.*[of Theorem 1] The result follows from an application of Theorem 7 to  $\Phi(Z)$ , defined as in Lemma 18. In particular, for large enough  $m$ , the following holds with probability at least  $1 - \delta$ :

$$R(f_Z) \leq \hat{R}_Z(f_Z) + \mathbb{E}_{Z \sim \mathcal{D}^m} [\Phi(Z)] + \sqrt{C\gamma_1^2 \frac{\ln^2 m}{m^{2/3}} \ln \left( \frac{1}{\delta - \frac{6\nu}{C'\gamma_1} \frac{1}{m^{7/6} \ln m}} \right)} ,$$

for some constants  $C, C'$  and  $\gamma_1 = \nu^4 |\mathcal{P}|^2 |\mathcal{S}|^{3/2} / \tau \sigma^3 \rho \pi$ . Thus, it remains to bound  $\mathbb{E}_{Z \sim \mathcal{D}^m} [\Phi(Z)]$ .

First note that we have  $\mathbb{E}_{Z \sim \mathcal{D}^m} [R(f_Z)] = \mathbb{E}_{Z, z \sim \mathcal{D}^{m+1}} [|f_Z(x) - y|]$ . On the other hand, we can also write  $\mathbb{E}_{Z \sim \mathcal{D}^m} [\hat{R}_Z(f_Z)] = \mathbb{E}_{Z, z \sim \mathcal{D}^{m+1}} [|f_{Z'}(x) - y|]$ , where  $Z'$  is a sample of size  $m$  containing  $z$  and  $m-1$  other points in  $Z$  chosen at random. Thus, by Jensen's inequality we can write

$$\left| \mathbb{E}_{Z \sim \mathcal{D}^m} [\Phi(Z)] \right| \leq \mathbb{E}_{Z, z \sim \mathcal{D}^{m+1}} [|f_Z(x) - f_{Z'}(x)|] .$$

Now an argument similar to the one used in Lemma 18 for bounding  $\beta_1$  can be used to show that, for large enough  $m$ , the following inequality holds:

$$\left| \mathbb{E}_{Z \sim \mathcal{D}^m} [\Phi(Z)] \right| \leq C\gamma_1 \frac{\ln m}{m^{5/6}} + \frac{2\nu}{m^3} ,$$

which completes the proof.  $\square$

## References

- [1] D. Hsu, S. M. Kakade, and T. Zhang. A spectral algorithm for learning hidden Markov models. *COLT*, 2009.
- [2] S. Kutin. Extensions to McDiarmid's inequality when differences are bounded with high probability. Technical report, TR-2002-04, University of Chicago, 2002.
- [3] M. Mohri, A. Rostamizadeh, and A. Talwalkar. *Foundations of Machine Learning*. The MIT Press, 2012.
- [4] G.W. Stewart and J. Sun. *Matrix perturbation theory*. Academic press New York, 1990.
- [5] L. Zwald and G. Blanchard. On the convergence of eigenspaces in kernel principal component analysis. *NIPS*, 2006.
